# Supplementary material
Source: publisher figshare collection journal article supplement (https://tandf.figshare.com/articles/dataset/_/24552712)
Supplement: Supplementary file 1 [file 1]

## Sheet: Article List
	No	Authors	Year of Publication	Name of journal	Journal article title	Keywords used (in the article)	Thematic focus	Geographical location(s)
	1	Haupt	2021	Urban Affairs Review	How Do Local Policy Makers Learn about Climate Change Adaptation Policies? Examining Study Visits as an Instrument of Policy Learning in the European Union	climate change adaptation, knowledge brokers, study visits, policy learning, urban policy mobilities	Climate Change	Europe (Copenhagen, Denmark and Antwerp, Belgium; Cascais, Portugal and Ilion, Greece; Bologna, Italy; Lleida, Spain; and Terra di Leuca, Italy; Bratislava, Slovakia; Bremen, Germany; and Arnhem, the Netherlands
	2	Haupt, et al.	2020	International Journal of Urban Sustainable Development	City-to-city learning within climate city networks: definition, significance, and challenges from a global perspective	city to city learning, climate governance, peer learning, policy learning, climate resilience, transnational city networks	Climate Change	Global
	3	Ilgen, Sengers, and Wardekker	2019	Water	City-To-City Learning for Urban Resilience : The Case of Water Squares in Rotterdam and Mexico City	city to city learning, policy transfer, resilient cities, and water squares	Water management and public space	Rotterdam, the Netherlands; Mexico City, Mexico
	4	Lee and van de Meene	2012	Policy Science	Who teaches and who learns? Policy learning through the C40 cities climate network	policy learning, climate change, transnational network, multi-stakeholder governing body, social network analysis, exponential random graph model	Climate Change	Global
	5	Shefer	2019	Journal of Environmental Policy and Planning	Policy transfer in city-to-city cooperation: implications for urban climate governance learning	urban climate governance, city to city cooperation, learning, policy transfer	Climate Change	Berlin and Freiburg, Germany and Tel Aviv-Yafo, Israel
	6	Ndebele, et al.	2020	Plos One	City to city learning and knowledge exchange for climate resilience in southern Africa	NA	Climate Change	Harare, Zimbabwe, Lusaka, Zambia, Windhoek, Namibia and Durban, Soith Africa
	7	Lee	2019	Journal of Environmental Policy and Planning	Network comparison of socialization, learning, and collaboration in the C40 cities climate group	Socialization, learning, collaboration, transnational climate network, social network analysis, centrality, quadratic assignment procedure test	Climate Change	44 Global Cities
	8	Betsill and Bulkeley	2004	International Studies Quarterly	Transnational networks and global environmental governance: The cities for climate protection program	NA	Climate Change	6 cities Newcastle, Cambridgeshire, and Leicester, UK; Denver and Milwaukee, US; Newscastle, New South Wales, Australia
	9	Perkins and Machnamy	2019	Global Environmental Change	‘A very human business’–Transnational networking initiatives and domestic climate action	Networking; Emotions; Solidarity; Learning; Climate Change; Transnational	Climate Change	Global
	10	Glaser, et al.	2021	Research in Transportation Business and Management	Learning from abroad: An interdisciplinary exploration of knowledge transfer in the transport domain	Knowledge transfer, study tours, cycling, transport policy, capacity building	Transport	USA
	11	Glaser and Brommelstroet	2020	Applied Mobilities	Unpacking policy transfer as a situated practice: blending social, spatial, and sensory learning at a conference	policy transfer, polucy learning, sustainable transport, cycling, conference learning, knowledge transfer	Transport	Netherlands
	12	Montero	2017	Environment and Planning	Study tours and inter-city policy learning: Mobilizing Bogota's transportation policies in Guadalajara	Policy learning, policy mobilities, study tours, South-South, Bogota, bus rapid transit	Transport	Bogota, Colombia and Guadalajara, Mexico
	13	Ma	2017	Journal of Chinese Political Science	Site visits, policy learning, and the diffusion of policy innovation: Evidence from public bicycle programs in China	Policy learning, urban transport, policy diffusion, public service innovation, network	Transport	China (and other cities outside China)
	14	Sheldrick, Evans, and Schliwa	2017	Urban Studies	Policy learning and sustainable urban transitions: mobilising Berlin's cycling renaissance	Cycling, policy mobility, sustainable urban transitions, transition management	Transport	Berlin, Germany and Manchester, UK
	15	Marsden, et al.	2011	Transport Policy	How do cities approach policy innovation and policy learning? A study of 30 policies in Northern Europe and North America	policy transfer, innovation, urban transport, policy learning, implementation	Transport	11 cities in Northern Europe, North America (Lyon, France, Nancy, France, Edinburgh, Scotland, Leeds, Englan, Bremen, germany, Stockholm, Sweden, Copenhagen, Denmark, Seattle, USA, Dallas, USA, San Francisco, USA, Vancouver, Canada
	16	Marsden, et al.	2012	Environment and Planning	Bounded rationality in policy learning amongst cities: Lessons from the transport sector	bounded rationality, policy transfer, mobility, transport	Transport	11 cities in Northern Europe, North America (Lyon, France, Nancy, France, Edinburgh, Scotland, Leeds, Englan, Bremen, germany, Stockholm, Sweden, Copenhagen, Denmark, Seattle, USA, Dallas, USA, San Francisco, USA, Vancouver, Canada
	17	Pojani and Stead	2014	Land Use Policy	Dutch planning policy: The resurgence of TOD	Policy transfer, planning, transportation, transit oriented development, Amsterdam, Netherlands	Urban planning	Amsterdam, the Netherlands
	18	Moodley	2020	Social Sciences and the Humanities Open	Exploring the mechanics of city-to-city learning in urban strategic planning: Insights from southern Africa	City to city learning, organizational learning, peer learning, urban planning	Urban strategic planning	South Africa (eThekwini), Malawi (Mzuzu), Namibia (Otijiwarango)
	19	Moodley	2019	Habitat International	Defining city-to-city learning in southern Africa: Exploring practitioner sensitivities in the knowledge transfer process	City to city learning, city mentorship, policy transfer, organisational learning, municipal cooperation, city strategy	Urban strategic planning	South Africa (eThekwini), Malawi (Mzuzu), Namibia (Otijiwarango)
	20	Zhang and Wang	2021	Public Administration and Development	How does policy innovation diffuse among Chinese local governments? A qualitative comparative analysis of River Chief Innovation	Chinese local government, policy innovation diffusion, policy learning and competition, qualitative comparative analysis, River Chief	River Chief Innovation	32 Chinese cities (27 provincial cities and 5 cities under state planning)
	21	Johnson and Wilson	2009	Habitat International	Learning and mutuality in municipal partnerships and beyond: A focus on northern partners	learning, mutuality, municipal partnerships, action learning spaces, institutionalisation	Environment (or public) health	Kampala, Uganda and Kirklees, Huddersfield, UK; Iganga, Eastern Uganda and Daventry, North Hamptonshier, UK
	22	Devers-Kanoglu	2009	Habitat International	Municipal partnerships and learning - Investigating a largely unexplored relationship	Municipal partnerships, informal learning, global education, education for sustainable development, transformative learning	Sustainable development	Germany; Amstelveen, Netherlands and Villa El Salvador, Peru; Charlesbourg, Canada and Ovalle, Chile; Yokohama, Japan and Penang, Malaysia; Dutch municipalities and others; Daventry, UK and Inganga, Uganda and Kirklees, UK and Kampala, Uganda
	23	Ewijk	2016	Population, Space, and Place	Engaging migrants in translocal partnerships: the case of Dutch-Moroccan and Dutch-Turkish municipal partnerships	municipal partnerships, local governance, migrants, Morocco, Turkey, the Netherlands	Ethnic and cultural diversity	Rotterdam-Casablanca; Zeist-Berkane, Meppel-Al Hoceima; Amsterdam-Kocaeli and Haarlem-Emirdag
	24	Van Ewijk, et al.	2015	Urban Studies	Capacity development or new learning spaces through municipal international cooperation: Policy mobility at work?	Benin, Indonesia, knowledge circulation, local governance, municipal international cooperation, municipal partnerships, mutual learning, Nicaragua, policy mobility, South Africa, the Netherlands	Local governance	Different municipalities from South Africa, Nicaragua, Indonesia, Benin, and the Netherlands
	25	Bontenbal	2013	Public Administration and Development	Differences in learning practices and values in north-south city partnerships: Towards a broader understanding of mutuality	twinning, city to city cooperation, north-south partnerships, learning, capacity building, mutuality, local governments, municipalities	Local governance	Amstelveen, Netherlands and Villa El Salvador, Peru; Utrecht, NL and Leon, Nicaragya; Oudtshoorn, South Africa and Alphen aan den Rijn, NL
	26	Butler, et al.	2017	American Journal of Political Sc ience	Ideology, Learning, and Policy Diffusion: Experimental Evidence	NA	Zoning and home foreclosure policies	US
	27	Cook and Ward	2011	Urban Studies	Trans-urban networks of learning, mega events and policy tourism: The case of manchester's commonwealth and olympic games projects	NA	Sports	Manchester, UK and other cities that hosted/bidding for major sporting events
	28	Campbell	2009	Habitat International	Learning cities: Knowledge, capacity and competitiveness	learning cities, knowledge, city to city, urban development, competititiveness, institutional capacity	Various	Bilbao, Spain, Seattle, Washington, Curitiba, Brazil
	29	Farmer and Perl	2020	Urban Research and Practice	The role of policy learning in urban mobility adaptation: exploring Vancouver's plan to remove the Georgia and Dunsmuir viaducts	infrastructure, expressways, urban, planning, policy	Infrastructure	Vancouver, Canada (and 20 other cities)
	30	Hatch and Mead	2021	Public Policy and Administration	Learning from laboratory mistakes: How policy entrepreneurs catalyze city ordinance repeals in the United States	local government, policy entrepreneur, policy learning, policy making, policy repeal and regional	City ordinance	7 cities in Cuyahoga Country, Ohio
	31	Peck and Theodore	2010	Geoforum	Recombinant workfare, across the Americas: Transnationalizing fast social policy	Conditional cash transfers, anti poverty policy, workforce, social policy	Anti poverty policy	New York - Mexico City
	32	Kalliomaki	2018	Planning Theory and Practice	Re-Contextualising Oregon's Urban Growth Boundary to City-Regional Planning in Tampere, Finland: The Need for Strategic Bridge-Building	travelling planning idea, transnational policy learning, strategic bridge building, urban growth management, Oregon's urban grwoth boundary, Tampere City region	Urban growth management	Tampere, Sweden and Oregon, USA
	33	Van Ewijk	2012	Tijdschrift voor Economische en Sociale Geografie –	Mutual Learning In Dutch‐Moroccan And Dutch‐Turkish Municipal Partnerships	city to city partnerships, local governance, mutual learning, the Netherlands, Morocco, Turkey	Local governance	Casablanca (Morocco), Zeist-Berkane (Morocco), Meppel–Al Hoceima (Morocco), Amsterdam–Kocaeli (Turkey) and Haarlem–Emirdag˘ (Turkey); Emirdag (Turkey), Berkane (Morocco) and Al Hoceima (Morocco) through co-operation with their partner municipalities in the Netherlands; Kocaeli (Turkey) and Amsterdam (the Netherlands); Casablanca (Morocco) and Rotterdam (the Netherlands); Berkane and Al Hoceima (M…
	34	Van Lindert	2009	Habitat International	Transnational linking of local governments: The consolidation of the Utrecht-León municipal partnership	Nicaragua, City-to-city cooperation, Decentralized development cooperation, Municipal partnerships. Transnational linking, Local governance	Local governance	Utrecht, the Netherlands and Leon, Nicaragua
	35	Baker and McGuirk	2018	Royal Geographical Society	He came back a changed man: The popularity and influence of policy tourism	governance, homelessness, housing first, learning, mobilities, Walter Benjamin	Homelesness	New York - Australia
	36	Gonzales	2011	Urban Studies	Bilbao and Barcelona in Motion: How urban regeneration models travel and mutate in the global flows of policy tourism	NA	Urban regeneration	Bilbao and Barcelona, Spain (and other cities)
	37	Gruber	2021	Cogitatio	Can Transnational Cooperation Support Municipalities to Address Challenges of Youth Migration?	Central and Eastern Europe; Danube Region; EU-internal mobility; INTERREG; organizational learning; transnational cooperation; youth migration	Youth migration	Cities and towns in Danube Region
	38	Tan, et al.	2021	Sustainability	How Transboundary Learning Occurs: Case Study of the ASEAN Smart Cities Network (ASCN)	smart city; policy transfer; transboundary learning; ASEAN; ASCN; enablers; barriers; motivations	Smart Cities	Asia
	39	Salskov-Iversen	2006	International Journal of Public Sector Management	Learning across borders: the case of Danish local government	Local government, innovation, globalization, Denmark	City learning	Denmark
	40	Lundin, et al.	2015	Public Administration	LEARNING FROM SUCCESS: ARE SUCCESSFUL GOVERNMENTS ROLE MODELS?	NA	City learning	Sweden
	41	Bellinson and Chu	2019	Journal of Environmental Policy and Planning	Learning pathways and the governance of innovations in urban climate change resilience and adaptation	climate change, resilience, transnational municipal networks, urban governance, innovation, learning	Climate Change	Berkley and Rotterdam
	42	Wood	2014	Environment and Planning A	Learning through policy tourism: circulating bus rapid transit from south america to south africa	bus rapid transit, policy tourism, South African urbanism, urban policy mobilities	Transport	Bogot, Colombia and South Africa (Johannesburg and Cape Town)
	43	Boulanger and Nagorny	2018	International Journal of Sustainable Development and Planning	Replication vs. mentoring: accelerating the spread of good practices for the low carbon transition	climate change, good practice, learning, mentoring, replication, urban sustainability transition	Low-Carbon transition	Europe
	44	Carolini, et al.	2018	Environment and Planning C: Politics and Space	The promise of proximity: The politics of knowledge and learning in South–South cooperation between water operators	Knowledge, learning, south-south cooperation, south america, water management	Water	Salta, Argentina and Brasilia, Brazil
	45	Bray, et al.	2011	Transport Policy	Transport policy in Australia—evolution, learning, and policy transfer	Transport policy, policy transfer, Australian metropolitan areas, policy formulation mode, policy instruments	Transport	Sydney, Melbourne, Brisbane, Perth, Adelaide
	46	Sonesson and Norden	2020	Sustainability	We learnt a lot: challenges and learning experiences in a southern african - north european municipal partnership on education and sustainable development	education for sustainable development, global development, global learning, Municipal Partnership programme, mutual South-North partnership, non-formal learning, SDG 17, tranformational learning	Education for sustainable development	Swakopmund, Namibia and Malmo, Sweden
	47	Johnson and Wilson	2006	Public Administration and Development	North-south/south-north partnerships: closing the mutuality gap	Practitioner, partnership, mutuality, learning, individuals, organisations	Environment (or public) health	Kampala, Uganda and Kirklees, Huddersfield, UK; Iganga, Eastern Uganda and Daventry, North Hamptonshier, UK
	48	Mocca	2018	International Journal of Urban Sustainable Development	All cities are equal, but some are more equal than others. Policy mobility and asymmetric relations in inter-urban networks for sustainability	Transnational municipalism, urban policy mobilities, local governments, urban sustainability, Europe	Urban regeneration	Birmingham, UK, Cremona, Hamburg, Lille, Malmo, Manchester, Torino
	49	Wolman and Page	2002	Governance: An International Journal of Policy, Administration, and Institutions	Policy Transfer among Local Governments: An Information–Theory Approach	NA	Urban regeneration policy	United Kingdom
	50	Bradlow	2015	International Development Planning Review	City learning from below: urban poor federations and knowledge generation through transnational, horizontal exchange	housing, social movements, bureaucracy, institutional learning, resettlement	Urban Development	Mumbai, India and Nairobi, Kenya
	51	Wilson and Johnson	2007	Local Government Studies	Knowledge, learning and practice in north-south practitioner to practitioner municipal partnerships	N/A	Local governance	Iganga Town Council (Uganda) and Daventry District Council (UK) and Kampala City Council (Uganda) and Kirklees Metropolitan Council (UK)
	52	Cook and Ward	2012	Urban Geography	Relational Comparisons: The Assembling of Cleveland's Waterfront Plan	Comparative urbanism, policy transfer, policy mobilities, waterfront development	Waterfront redevelopment	Cleveland, Ohio (learning from other cities e.g. Baltimore and Chicago)
	53	Ansell, et al.	2017	Local Government Studies	How learning aggregates: a social network analysis of learning between Swedish municipalities	Local government; learning; social network analysis; Sweden; public administration	City learning	Sweden
	54	Baldersheim, et al.	2002	Regional & Federal Studies	Mayors learning across borders: the international networks of municipalities in East-Central Europe	NA	City learning	Czech Republic, Poland, Slovakia
	55	Einstein, et al.	2019	Political Reserch Quarterly	City learning: Evidence of Policy Information Diffusion from a Survey of US Mayors	policy diffusion, local politics, urban politics, mayors	City learning	US
	56	Valkering, et al.	2013	Journal of Cleaner Production	An analysis of learning interactions in a cross-border network for sustainable urban neighbourhood development	Sustainable developmentUrban developmentLearning networksJoint learningKnowledge boundaries	Urban neighborhopod development	Eurogeo Meuse-Rhine region (Germany, Netherlands, Belgium)
	57	Pereira	2021	British Journal of Political Science	How do Public Officials Learn About Policy? A Field Experiment on Policy Diffusion	policy learning; partisanship; field experiment; policy diffusion; American politics	Immigrant inclusion policies	United States
	58	Butler, et al.	2019	Research and Politics	Studying policy diffusion at the individual level: Experiments on nationalistic biases in information seeking	policy diffusion, experiment, Europe	Solid waste management	Europe (Austria, Belgium, Estonia, Finland, Germany, Hungary, Italy, Netherlands, and Sweden)
	59	Takao	2014	Policy Studies	Policy learning and diffusion of Tokyo’s metropolitan cap-and-trade: making a mandatory reduction of total CO2 emissions work at local scales	policy diffusion, policy learning, climate change, cap-and-trade, Tokyo	Climate Change	Tokyo, Japan
	60	Calzada	2020	Smart Cities	Replicating Smart Cities: The City-to-City Learning Programme in the Replicate EC-H2020-SCC Project	smart cities, social innovation, replication, city to city learning, policy, Europe, action research, GDPR, Covid 19, solutionism	smart cities	Europe (St. Sebastian, Florence, Bristol, Essen, Lausanne, Nilufer)

## Sheet: General
	GENERAL RESULTS
	Table 1: Distribution of articles according to year of publication				Table 2. Distribution of articles according to journal						Table 3. Distribution of articles according to keywords used (in the article)					Table 4. Distribution of articles according to thematic focus					Table 5. Distribution of articles according to geographical locations
	Year of Publication	Frequency	Percentage		No.	Name of Journal	Frequency	Percentage		No.	Individual keywords	Frequency	Percentage		No.	Thematic focus	Frequency	Percentage		No.	Geographical Location of C2C	Frequency	Percentage
	2002	2	0.0333333		1	Habitat International	5	0.0833333		1	learning	13	0.0451389		1	Climate Change	10	0.166667		1	Within Europe	17	0.283333
	2004	1	0.0166667		2	Urban Studies	4	0.0666667		2	policy learning (including transnational policy learning and policy learning and competition)	12	0.0416667		2	Transport	9	0.15		2	Global	11	0.183333
	2006	2	0.0333333		3	Journal of Environmental Policy and Planning	3	0.05		3	policy transfer	10	0.0347222		3	City learning (general)	5	0.0833333		3	Within North America	7	0.116667
	2007	1	0.0166667		4	Public Administration and Development	3	0.05		4	policy mobilities	9	0.03125		4	Local governance	5	0.0833333		4	Europe and North America	4	0.0666667
	2009	4	0.0666667		5	Environment and Planning	2	0.0333333		5	urban transport	7	0.0243056		5	Water management	3	0.05		5	Europe and Africa	4	0.0666667
	2010	2	0.0333333		6	Sustainability	2	0.0333333		6	climate change , including adaptation and resilience	7	0.0243056		6	Urban regeneration	3	0.05		6	Within Asia	4	0.0666667
	Subtotal	12	0.2		7	Transport Policy	2	0.0333333		7	innovation	6	0.0208333		7	Urban planning	3	0.05		7	Within Africa	3	0.05
	2011	3	0.05		8	International Journal of Urban Sustainable Development	2	0.0333333		8	local governament	6	0.0208333		8	Environment (or public) health	2	0.0333333		8	Within South America	2	0.0333333
	2012	4	0.0666667		9	Local Government Studies	2	0.0333333		9	city to city learning	5	0.0173611		9	Smart Cities	2	0.0333333		9	Between Europe and South America	2	0.0333333
	2013	2	0.0333333		10	Urban Geography	1	0.0166667		10	policy diffusion	5	0.0173611		10	Ethnic and cultural diversity	1	0.0166667		10	Between Africa and South America	1	0.0166667
	2014	3	0.05		11	Research in Transportation Business and Management	1	0.0166667		11	municipal partnerships	5	0.0173611		11	Urban Development	1	0.0166667		11	Between North America and South America	1	0.0166667
	2015	4	0.0666667		12	Environment and Planning C: Politics and Space	1	0.0166667		12	social network analysis	4	0.0138889		12	Infrastructure	1	0.0166667		12	Within Australia	1	0.0166667
	2016	1	0.0166667		13	British Journal of Political Science	1	0.0166667		13	the netherlands	4	0.0138889		13	Urban neighborhopod development	1	0.0166667		13	Between North America and Australia	1	0.0166667
	2017	4	0.0666667		14	Geoforum	1	0.0166667		14	planning	3	0.0104167		14	Homelesness	1	0.0166667		14	Between Europe and Asia	1	0.0166667
	2018	6	0.1		15	International Development Planning Review	1	0.0166667		15	local governance	3	0.0104167		15	Low-Carbon transition	1	0.0166667		15	Between Asia and Africa	1	0.0166667
	2019	8	0.133333		16	Population, Space, and Place	1	0.0166667		16	europe	3	0.0104167		16	Waterfront redevelopment	1	0.0166667			Total	60	1
	2020	9	0.15		17	International Journal of Public Sector Management	1	0.0166667		17	mutuality	3	0.0104167		17	Education for sustainable development	1	0.0166667
	2021	4	0.0666667		18	Regional & Federal Studies	1	0.0166667		18	cycling	3	0.0104167		18	Urban growth management	1	0.0166667
	Subtotal	48	0.8		19	International Journal of Sustainable Development and Planning	1	0.0166667		19	peer learning	2	0.00694444		19	Youth migration	1	0.0166667
	Total	60	1		20	Smart Cities	1	0.0166667		20	city to city cooperation	2	0.00694444		20	Zoning and home foreclosure policies	1	0.0166667
					21	Cogitatio	1	0.0166667		21	capacity building	2	0.00694444		21	Various	1	0.0166667
					22	Global Environmental Change	1	0.0166667		22	replication	2	0.00694444		22	Sports	1	0.0166667
					23	International Studies Quarterly	1	0.0166667		23	study tours	2	0.00694444		23	Sustainable development	1	0.0166667
					24	Governance: An International Journal of Policy, Administration, and Institutions	1	0.0166667		24	organizational learning	2	0.00694444		24	Immigration	1	0.0166667
					25	Journal of Chinese Political Science	1	0.0166667		25	morocco	2	0.00694444		25	City ordinances	1	0.0166667
					26	Public Administration	1	0.0166667		26	turkey	2	0.00694444		26	Anti poverty policy	1	0.0166667
					27	Journal of Cleaner Production	1	0.0166667		27	others (unique keywords)	164	0.569444		27	Solid waste management	1	0.0166667
					28	Public Policy and Administration	1	0.0166667			Total	288	1			Total	60	1
					29	Applied Mobilities	1	0.0166667
					30	Research and Politics	1	0.0166667
					31	Land Use Policy	1	0.0166667
					32	Royal Geographical Society	1	0.0166667
					33	Environment and Planning A	1	0.0166667
					34	Social Sciences and the Humanities Open	1	0.0166667
					35	Water	1	0.0166667
					36	Tijdschrift voor Economische en Sociale Geografie –	1	0.0166667
					37	Plos One	1	0.0166667
					38	Urban Affairs Review	1	0.0166667
					39	Policy Science	1	0.0166667
					40	Urban Research and Practice	1	0.0166667
					41	Policy Studies	1	0.0166667
					42	Political Reserch Quarterly	1	0.0166667
					43	American Journal of Political Sc ience	1	0.0166667
					44	Planning Theory and Practice	1	0.0166667
						Total	60	1

## Sheet: Conceptual
	SPECIFIC RESULTS: CONCEPTUAL ANALYSIS
	Table 6. Definitions of C2C learning
	No	Authors	Definitions of C2C learning
	1	Haupt, et al. (2020)	C2C learning is a process of mutual learning between cities, and on how to learn and improve together
	2	Moodley (2019)	C2C learning is “a structured, yet flexible process of acquiring new knowledge, willingly shared by skilled, experienced practitioners and their collaborative partners, in an empowering manner, among two or more cities or towns, in order to improve municipal service delivery and good governance”.
	3	Calzada (2020)	C2C learning is an interaction and learning [process] among cities and their related stakeholders that is multidirectional, radial, dynamic, iterative, and democratic.
	Table 7. Definitions of learning
	No	Categories		Frequency	Percentage
	1	Learning as a process	Learning as acquisition of knowledge which is then tested, converted, used to make change and stored for future use (Campbell, 2009; also Cook and Ward, 2012); Learning as exchange and co-production of knowledge or joint knowledge construction (Wilson and Johnson, 2007; Valkering, et al., 2013) Driven intentionally either by the learner him/herself or via support structures (Devers-Kanoglu, 2009)…	8	0.133333
	2	Learning as a process and an outcome	A process that leads to improved understanding of an issue as well as to alteration or updating of behavior, strategies, thoughts, and beliefs in light of other actor's experiences or as a response to new information (Ansell, et al. 2017; Johnson and Wilson, 2006; Lee, 2019; Perkins and Machnamy, 2019; Montero, 2017; Lundin, et al., 2015)	6	0.1
	3	Learning as an outcome	Based on the premise of change (Ndebele, et al., 2020) and Improved understanding as reflected by a decision to produce more effeicient and effective policy outcomes than the previous ones (Takao, 2014) Improved understanding of cause and effect relationships in light of experience (Glaser and Brommelstroet, 2020)	3	0.05
	4	Learning not as emulation	Learning and emulation are often used interchangeably, even if they are conceptually distinct. Learning is "rational or bounded rational, while emulation is purely imitation without conscientious calculation of costs and benefits". "Learning can be either the direct adoption of concrete policies or indirect heuristics of ideas, and both approaches benefit policy design and implementation. Lesson …	1	0.0166667
	5	Learning as emulation or inspiration	Learning is an emulation/inspiration, open and unstructured process that draws lessons from foreign jurisdictions rather than relying on benchmarking and adopting concrete approaches or policies (Shefer, 2019).	1	0.0166667
	6	Learning as capacity	Learning is related to capacities, such as innovativeness and resourcefulness, as well as to practices and relations, such as experimentation, knowledge sharing, and collaboration (Ilgen, et al., 2019)	1	0.0166667
	7	No indication		40	0.666667
				60	1
	Table 8. Distribution of articles according to learning concept, theory, or framework used, inclusing definitions
	No	Learning concept, theory, or framework used	Definitions and authors and years of publication	Frequency	Percentage
	1	Policy transfer	Policy transfer is ‘the process by which knowledge about policies, administrative arrangements, institutions and ideas in one political system…is used in the development of policies, administrative arrangements, institutions and ideas in another political system’ (Dolowitz & Marsh, 2000). See Marsden, et al. (2011); Marsden, et al. (2012); Pojani and Stead (2014); Bray, et al. (2011); Wolman and …	6	0.1
	2	Municipal partnerships, including decentralized cooperation	Municipal partnerships are results-oriented collaborations in joint projects on sustainability; municipal partnerships may be identified, explicitly, as relevant learning contexts; every municipal partnership is unique, and some have been verified to be significant also for individual learning (Sonesson and Norden, 2020) Partnerships are dynamic processes through which partners have the potential…	5	0.0833333
	3	Policy learning	Policy learning is the use of information and knowledge to make predictions of the future, which are then used to make decisions (Bennett and Howlett, 1992). See Ilgen, et al. (2019); Betsill and Bulkeley (2004); Montero (2017); Kalliomaki (2018)	4	0.0666667
	4	Peer to peer learning	Experts from a particular field in one partner municipality share their knowledge and skills with colleagues from the other (Van Ewijk, et al., 2015). See Van Ewijk, et al. (2015); Bontenbal (2013); Carolini, et al. (2018)	3	0.05
	5	Networking/networks	Learning network is a network of actors that facilitate learning (Valkering, et al., 2013). International networking as a learning process (Baldersheim, et al., 2002)	2	0.0333333
	6	Policy transfer and mobilities	Policy mobilities emphasizes the mobile character of policies – or models – that mutate through trans local circuits, networks and webs (Cook and Ward, 2012) Also see Glaser and Brommelstroet (2020)	2	0.0333333
	7	Policy tourism	Policy tourism (characterized by study tours, site visits, and other fact finding trips, including conferences and even consultancy, is a critical means of circulating best practice across divergent landscapes. See Gonzales (2010)	1	0.0166667
	8	Policy diffusion	See Einstein, et al. (2019)	1	0.0166667
	9	Social learning	learning from others through observation in the hope that this may lead to the rest of the social learning components of application) Ndebele, et al. (2020)	1	0.0166667
	10	Institutional learning and bureacreatic learning	Institutional learning processes take place within the bounds of formal institutions (Bradlaw, 2015)	1	0.0166667
	11	Government learning	Government learning looks at how public officials (who) learn policy or process related ideas (what) for organizational or program change (Bennett and Howlett, 1992 in Lee, 2019)	1	0.0166667
	12	Organizational learning	Organizational learning or the "ability and capacity of an organization and its members to identify, examine, and resolve problems" See Glaser, et al.(2020)	1	0.0166667
	13	Policy transfer and governance learning	Governance learning as an instrumental policy learning by policymakers and other government actors about designing and running participatory planning processes in order to improve their effectiveness (Newig, et al., 2016 in Shefer (2019))	1	0.0166667
	14	Policy learning and political learning	See Perkins and Machnamy (2019)	1	0.0166667
	15	Policy diffusion, policy transfer, and policy mobility	See Haupt, et al. (2020)	1	0.0166667
	16	Policy learning and policy mobilities	See Sheldrick, et al. (2017)	1	0.0166667
	17	Policy tourism, policy mobilities	See Wood (2014)	1	0.0166667
	18	Intercity learning, policy learning, diffusion	See Ma (2017)	1	0.0166667
	19	Learning patterns	Learning patterns (of how learning among local governments may aggregate). See Ansell, et al. (2017)	1	0.0166667
	20	Policy diffusion learning and decision theoretic learning	Policy diffusion learning (an externally oriented process whereby policymakers find out about laws in other jurisdictions, process information regarding the success of those policies, and modify their own policies accordingly (various authors); Decision theoretic learning (internal to a jurisdiction whereby policymakers gather information about the success of their own policies and modify their p…	1	0.0166667
	21	Replication	Replication as a process in which projects, programs, policies, administrative arrangements or technologies are diffused between and/or inside the same or different levels of government in order to copy and/or adapt them to their own context with the aim to make the urban low-carbon transition quicker, cheaper and thus more effective (Boulanger and Nagorny, 2018)	1	0.0166667
	22	Transnational municipalism, policy mobility	Transnational municipalism (examination of the structure, functions, and activities of transnational municipal networks), policy mobility (policy learning processes amon municipalities engaged at international level) See Mocca (2018)	1	0.0166667
				22	0.366667
				60	1

## Sheet: Objectives
	SPECIFIC RESULTS: METHODOLOGICAL ANALYSIS
	Table 9: Distribution of articles based on main research objectives
	Research focus	Main research objectives	Authors and Year of Publication	Frequency	Percentage
	Process	to understand learning processes and mechanisms, including conditions. These cover transfer of knowledge and information, knowledge generation and transmission, knowledge production and reproduction	Haupt, et al. (2019); Moodley (2019); Johnson and Wilson (2009); Van Ewijk (2016); Van Lindert (2009); Carolini, et al. (2018); Ilgen, et al. (2019); Devers-Kanoglu (2009); Bontenbal (2013); Tan, et al. (2021); Ansell, et al. (2017); Pojani and Stead (2014); Moodley (2020); Campbell (2009); Cook and Ward (2012); Haupt (2020); Lee (2019); Glaser, et al. (2020); Glaser and Brommelstroet (2020); Mon…	28	0.466667
		to investigate learning relationships, including mutuality of actors involved	Sheldrick, et al. (2017); Van Ewijk (2012); Lundin, et al. (2015); Johnson and Wilson (2006); Wilson and Johnson (2007); Valkering, et al. (2013); Butler, et al. (2019); Baldersheim, et al. (2002)	8	0.133333
		to explore the origins/evolution of ideas through learning and related concepts (e.g. policy formulation, development, mobility, and transfer)	Peck and Theodore (2010); Bray, et al. (2011); Kalliomaki (2018)	3	0.05
			Subtotal	39	0.65
	Effect	to understand what contributes to/facilitate learning	Shefer (2019); Ndebele, et al. (2020); Pereira (2021); Betsill and Bulkeley (2004); Van Ewijk, et al. (2015); Butler, et al. (2015); Salskov-Iversen (2006); Bradlow (2015); Perkins and Machnamy (2019)	9	0.15
		to examine the outcomes and effect of learning, including factors	Ma (2017); Zhang and Wang (2020); Farmer and Perl (2018); Wood (2014); Gruber (2021); Takao (2014)	6	0.1
			Subtotal	15	0.25
	Others	to explore links to other concepts, such as policy transfer, policy learning, policy tourism, policy diffusion, or replication	Wolman and Page (2002); Lee and Van de Meene (2012); Marsden, et al. (2011); Gonzales (2010); Calzada (2020)	5	0.0833333
		to understand difference between concepts e.g. innovations in governance and governance in innovations	Bellinson and Chu (2019)	1	0.0166667
			Subtotal	6	0.1
			Total	60	1
	Table 10: Distribution of articles based on sub-research objectives
	Research sub-focus	Sub research objectives (multiple responses)	Authors and Year of Publication	Frequency	Percentage
	Context	to identify who are the actors involved	Ilgen, et al. (2019); Lee and Van de Meene (2012); Shefer (2019); Marsden, et al. (2011); Pojani and Stead (2014); Bontenbal (2013); Farmer and Perl (2018); Tan, et al. (2021); Bray, et al. (2011); Cook and Ward (2012)	10	0.0925926
		to identify the motivations of actors	Haupt (2020); Haupt, et al. (2019); Shefer (2019); Marsden, et al. (2011); Marsden, et al. (2012); Pojani and Stead (2014); Cook and Ward (2011); Cook and Ward (2012); Takao (2014)	9	0.0833333
		to understand the content of learning	Haupt, et al. (2019); Shefer (2019); Marsden, et al. (2011); Pojani and Stead (2014); Bontenbal (2013); Carolini, et al. (2018); Bray, et al. (2011); Sonesson and Norden (2020); Mocca (2018)	9	0.0833333
		to examine the role of actors involved	Haupt, et al. (2019); Mocca (2018); Van Ewijk (2016)	3	0.0277778
		Subtotal		31	0.287037
	Process	to understand how learning processes take place	Pojani and Stead (2014); Wood (2014); Montero (2017); Van Lindert (2009); Gruber (2021); Mocca (2018); Marsden, et al. (2011); Ilgen, et al. (2019); Ansell, et al. (2017); Johnson and Wilson (2009); Carolini, et al. (2018); Ansell; et al. (2017); Tan, et al. (2021)	13	0.12037
		to understand specific learning phase/s	Information seeking/search: Marsden, et al. (2012); Lee (2019); Knowledge acquisition: Cook and Ward (2011); Information seeking, assessment and utilization: Wolman and Page (2002); Knowledge production and learning: Bradlow (2015); Search, sharing and production of knowledge: Salskov-Iverson (2006); Knowledge acquisition, use, exchange, sharing and stored: Campbell (2009); knowledge utilization …	10	0.0925926
		To understand other learning aspects	forms of learning: Haupt (2020); mode and source of learning: Shefer (2019); mutuality in learning: Haupt (2020); Van Ewijk (2012); Johnson and Wilson (2006); learning convergence and divergence: Bontenbal (2013)	6	0.0555556
		Subtotal		29	0.268519
	Conditions	to examine the enablers, barriers, obstacles, or challenges for learning	Marsden, et al. (2011); Pojani and Stead (2014); Tan, et al. (2021); Bray, et al. (2011); Sonesson and Norden (2020)	5	0.0462963
		to explore the factors for information seeking/search process	Marsden, et al. (2012); Wolman and Page (2002); Einstein, et al. (2019)	3	0.0277778
		to understand contextual differences affecting learning processes and outcomes	Haupt (2020)	1	0.00925926
		to identify obstacles and opportunities for C2C learning within TMNs	Haupt, et al. (2019)	1	0.00925926
		to explore the weaknesses and strengths of learning	Shefer (2019)	1	0.00925926
		to understand the characteristics of study tours that facilitate learning	Glaser, et al. (2020)	1	0.00925926
		to examine site conditions for participant learning	Glaser and Brommelstroet (2020)	1	0.00925926
		to explore the receptivity of organizations to individual learning	Bontenbal (2013)	1	0.00925926
		to understand the conditions for learning	Carolini, et al. (2018)	1	0.00925926
		to examine how partisanship shapes policy learning	Pereira (2021)	1	0.00925926
		to understand how political ideology affect policymakers' willingness to learn	Butler, et al. (2015)	1	0.00925926
		To explore forces driving international networking	Baldersheim et al. (2002)	1	0.00925926
		Subtotal		18	0.166667
	Effects	To understand specific effects related to:	Policy adoption: Haupt (2020); Change in beliefs and objectives: Takao (2014); Policy change: Montero (2017); Action: Perkins and Machnamy (2019); Policy learning and transfer: Betsill and Bulkeley (2004); Policy success or failure: Takao (2014); Circulation, adoption, and implementation: Wood (2014); Policy transfer, including evidence, type of change (whether positive or negative): Farmer and P…	11	0.101852
		To explore the outcomes or effects of learning, including demonstration	Degree and depth: Shefer (2019); Sonesson and Norden (2020); Carolini, et al. (2018); Bray, et al. (2011)	4	0.037037
		Subtotal		15	0.138889
	Venue	to understand where learning takes place	Glaser and Brommelstroet (2020); Devers-Kanoglu (2009)Bray, et al. (2011); Wolman and Page (2002); Cook and Ward (2012); Baldersheim, et al. (2002); Valkering, et al. (2013); Takao (2014)	8	0.0740741
		to understand study visits and exchanges as venues for learning	Haupt (2020); Ndebele, et al. (2020); Glaser, et al. (2020);	3	0.0277778
		to understand the role of policy tourism	Cook and Ward (2011); Baker and Mcguirk (2018); Gonzales (2010);	3	0.0277778
		Subtotal		14	0.12963
	Definition	to understand how C2C learning is understood and defined	Moodley (2009)	1	0.00925926
			Total	108	1
	Table 11: Distribution of articles based on learning as independent or dependent variable
	Learning as independent variable	Dependent variable	Authors and year of publication	Frequency	Percentage
	Interlocal learning and tournament	Innovation diffusion	Zhang and Wang (2020)	1	0.0909091
	Policy learning	Policy diffusion	Ma (2017)	1	0.0909091
	Policy learning	Policy transfer	Farmer and Perl (2018)	1	0.0909091
	(Learning) exchanges	Policy circulation and adoption	Wood (2014)	1	0.0909091
			Subtotal	4	0.363636
	Independent variable	Learning as dependent variable	Authors and year of publication
	C2C cooperation	Governance learning	Shefer (2019)	1	0.0909091
	Municipal international cooperation	Knowledge transfer, learning processes and policy mobilities	Van Ewijk, et al. (2015)	1	0.0909091
	City exchanges	Learning	Ndebele, et al. (2020)	1	0.0909091
	Networks	Policy learning and change	Betsill and Bulkeley (2004)	1	0.0909091
	Transnational activities	Public sector learning, innovation, and development	Salskov-Iversen (2006)	1	0.0909091
	Transnational grassroots networks	Knowledge production and learning	Bradlow (2015)	1	0.0909091
	Transnational networking initiatives	Action through learning, resource acquisition and inspiration	Perkins and Machnamy (2019)	1	0.0909091
			Subtotal	7	0.636364
			Total	11	1

## Sheet: Methodology
	SPECIFIC RESULTS: METHODOLOGICAL ANALYSIS
	Table 12: Distribution of articles based on research strategy				Table 13: Distribution of articles based on primary and secondary data collection techniques					Table 14: Distribution of articles based on data analysis techniques
	Research strategy	Frequency	Percentage		Research strategy	Primary data	Frequency	Percentage		Research strategy	Data analysis techniques	Frequency	Percentage
	Qualitative	41	0.683333		Qualitative (n=41)	Interviews	17	0.414634		Qualitative (n=41)	Content analysis	3	0.0731707
	Quantitative	8	0.133333			Interviews and participant observation	7	0.170732			Thematic analysis	2	0.0487805
	Mixed method	4	0.0666667			Interviews and survey	3	0.0731707			Coding	2	0.0487805
	No indication	7	0.116667			Survey	2	0.0487805			Nvivo (Qualitative analysis)	1	0.0243902
	Total	60	1			Interviews and field visits	1	0.0243902			Systematic process analysis	1	0.0243902
						Interviews and focus group discussions	1	0.0243902			Phenomenographic approach, contextual analysis	1	0.0243902
						Interviews and report validation	1	0.0243902			Coding and thematic analysis	1	0.0243902
						Report validation	1	0.0243902			Cross case and within case analysis	1	0.0243902
						Interviews, focus group discussions, and participant observation	1	0.0243902			No indication	29	0.707317
						Interviews, field visits, and participant observation	1	0.0243902			Subtotal	41	1
						No indication	6	0.146341		Quantitative (n=8)	Logit analysis, including exponential random graph model (ERGM) network models	2	0.25
						Subtotal	41	1			Social network analysis	1	0.125
						Secondary data					Social network analysis, quadratic assignment procedure	1	0.125
						Document analysis	26	0.634146			Regression analysis	1	0.125
						No indication	15	0.365854			No indication	3	0.375
						Subtotal	41	1			Subtotal	8	1
					Quantitative (n = 8)	Survey	8	1		Mixed method (n=4)	Quantitative socal network analysis, exponential random graph model)	1	0.25
						Subtotal	8	1			No indication	3	0.75
					Mixed Method (n =4)	Survey and document analysis	1	0.25			Subtotal	4	1
						Survey and interviews	1	0.25		No indication (n=7)	NA	7	1
						Survey, ethnographic field work, and participant observation	1	0.25			Total	60
						No indication	1	0.25
						Subtotal	4	1
					No indication (n = 7)	No indication	7	1
					Total		60
										60

## Sheet: Context
	SPECIFIC RESULTS: CONTEXT ANALYSIS
	Table 15: Distribution according to type of actors involved
		Type of actors	Authors and Year of Publication	Frequency	Percentage
	Multi-actor	Public, private, and civil society actors	Van Ewijk (2016); Shefer (2019)	2	0.0333333
		Policy actors and politicians	Wood (2014); Bray, et al. (2011)	2	0.0333333
		Elected and non-elected officials	Mocca (2018)	1	0.0166667
		Policy actors and policy consultants	Cook and Ward (2012)	1	0.0166667
		Climate managers and policy consultants	Boulanger and Nagorny (2018)	1	0.0166667
		City decisionmakers and practitioners	Ndebele, et al. (2020)	1	0.0166667
		Local public and private actors	Montero (2017)	1	0.0166667
		Public actors and scientific institutions (universities)	Gruber (2021)	1	0.0166667
		Councillors, policy entrepreneours, city staff, consultants, and media	Farmer and Perl (2018)	1	0.0166667
		Project partners and beneficiaries	Valkering, et al. (2013)	1	0.0166667
		Elected offciails, local officials, private suppliers, consultant firms, residents, interest groups, academics	Marsden, et al. (2011)	1	0.0166667
		Spatial planning office; embassy; architectural firm	Ilgen, et al. (2019)	1	0.0166667
		Government agencies, enterpises, media, non profits, and international organizations	Ma (2017)	1	0.0166667
		Civil servants, transport advocates, consultants, academics, industry, politicians	Glaser and Brommelstroet (2020)	1	0.0166667
		Local government officials, city federations, and communities	Bradlow (2015)	1	0.0166667
		Local authorities, NGOS, CBOs, private sector, academic/research, education	Devers-Kanoglu (2009)	1	0.0166667
		Local government administrators, local political leaders	Bontenbal (2013)	1	0.0166667
		Public sector, private sector, independent experts	Pojani and Stead (2014)	1	0.0166667
		Transport planners, consultants, other stakeholders	Sheldrick, et al. (2017)	1	0.0166667
			Subtotal	21	0.35
	Singular Actor	City or municipal officers/officials, including mayors	Glaser, et al. (2020); Pereira (2021); Wolman and Page (2002); Wilson and Johnson (2007); Butler, et al. (2015); Baldersheim, et al. (2002); Einstein, et al. (2019); Johnson and Wilson (2006);	8	0.133333
		Civil servants	Ansell, et al. (2017); Lundin, et al. (2015); Tan, et al. (2021)	3	0.05
		Policy makers	Haupt (2020); Haupt, et al. (2019); Lee and Van de Meene (2012)	3	0.05
		Urban planning practitioners	Moodley (2019); Moodley (2020)	2	0.0333333
		Local authorities	Betsill and Bulkeley (2004)	1	0.0166667
		Legislators	Perkins and Machnamy (2019)	1	0.0166667
		Water operators	Carolini, et al. (2018)	1	0.0166667
			Subtotal	19	0.316667
				40	0.666667
		No indication	Subtotal	20	0.333333
		Total		60	1
	Table 16: Distribution according to the type of role of actors
	No.	Roles of city actors		Frequency	Percentage
	1	Mentors/teachers and mentees/learners, including mutual learning	Haupt (2020); Carolini, et al. (2018); Moodley (2019); Moodley (2020); Ilgen, et al. (2019); Johnson and Wilson (2006); Mocca (2018)	6	0.1
	2	Hosts/visted and visiting/tourists	Wood (2014); Gonzales (2010); Ndebele, et al. (2020)	3	0.05
	3	Sources/senders and seekers/receivers/receipients	Lee and Van de Meene (2012); Wolman and Page (2002); Shefer (2009)	3	0.05
	4	Pioneers/leaders and followers/laggards	Haupt, et al. (2019)	1	0.0166667
	5	Lighthouse and fellow/follower cities	Calzada (2020)	1	0.0166667
			Subtotal	14	0.233333
		No indication	Subtotal	46	0.766667
			Total	60	1
		Other roles
	1	Networks as knowledge brokers, process facilitators, or as learning environments	Haupt (2020); Haupt, et al. (2019); Lee and Van de Meene (2012); Betsill and Bulkeley (2004); Perkins and Machnamy (2019); Tan, et al. (2021); Valkering, et al. (2013); Bradlow (2015); Mocca (2018)	9	0.15
	2	Producers of information, who may be indirect senders; and facilitators	Wolman and Page (2002)	1	0.0166667
			Subtotal	10	0.166667
	3	No indication	Subtotal	50	0.833333
	Total			60	1
	Table 17: Distribution according to the learning motivation
	No.	Learning motivations (multiple options)	Authors and Year of Publication (n=17 or 28%)	Frequency	Percentage
	1	Local problems and pressures e.g. strategic need, policy failure, or project collapse	Haupt (2020); Baldersheim, et al. (2002); Cook and Ward (2012); Salskov-Iverson (2006); Pojani and Stead (2014); Marsden, et al. (2012); Marsden, et al. (2011)	10	0.15873
	2	Need for publicity and exposure at different levels (local, national, and international) to raise city profile and gain recognition	Haupt, et al. (2019); Salskov-Iverson (2006); Shefer (2009)	10	0.15873
	3	Opportunity to learn and share knowledge with other cities, including getting inspiration from best practices and receiving review of work from others	Haupt, et al. (2019); Salskov-Iverson (2006); Pojani and Stead (2014); Marsden, et al. (2012)	6	0.0952381
	4	Available opportunities and incentives e.g. through membership in associations and available funding	Salskov-Iverson (2006); Baldersheim, et al. (2002); Pojani and Stead (2014); Marsden, et al. (2012); Marsden, et al. (2011)	6	0.0952381
	5	Individual factors e.g. accruing reputational capital and taking on a professional challenge	Cook and Ward (2012); Johnson and Wilson (2006); Bontenbal (2013)	6	0.0952381
	6	Legitimization and influence e.g. having reference cases to justify policies and reinforce agendas	Mocca (2018); Bray, et al. (2011); Marsden, et al. (2011)	5	0.0793651
	7	Altruism and solidarity through contribution to local development and provision of technical assistance	Bontenbal (2013)	5	0.0793651
	8	Competitive and coercive mechanisms, which can be influenced by local officials; economic support; and topdown planning	Shefer (2009); Marsden, et al. (2012); Marsden, et al. (2011); Sheldrick, et al. (2017); Takao (2014)	5	0.0793651
	9	Access to new opportunities, such as for marketing/lobbying, professional networks, and partnerships for future projects	Haupt (2020); Shefer (2009); Cook and Ward (2011)	4	0.0634921
	10	City branding	Haupt (2020); Shefer (2009)	2	0.031746
	11	Comparability (or commonality of issues)	Bray, et al. (2011); Tan, et al. (2011)	2	0.031746
	12	Proximity e.g. ideological, philosophical, and spatial	Shefer (2009)	1	0.015873
	13	Curiosity	Marsden, et al. (2011)	1	0.015873
	Total			63	1
	Table 18: Distribution according to the learning content
	No.	Learning content	Authors and Year of Publication	Frequency	Percentage
	Climate	Various climate change topics	Haupt, et al. (2019); Lee and Van de Meene (2012); Bellinson and Chu (2019); Betsill and Bulkely (2004); Ndebele, et al. (2020); Lee (2019); Haupt, et al. (2020)	7	0.116667
		Cap and trade systems	Takao (2014)	1	0.0166667
		Policy ideas and technical solutions	Shefer (2019)	1	0.0166667
		Legislative, policy, and administrative developments	Perkins and Machnamy (2019)	1	0.0166667
		Sub total		10	0.166667
	Transport	Cycling	Glaser and Brommelstroet (2020); Glaser, et al. (2020); Sheldrick, et al. (2017)	3	0.05
		Bus rapid transit system	Wood (2014); Montero (2017)	2	0.0333333
		Transport policy innovations	Marsden, et al. (2011); Marsden, et al. (2012)	2	0.0333333
		Public bicycle programs	Ma (2017)	1	0.0166667
		Transport strategies	Bray, et al. (2011)	1	0.0166667
		Sub total		9	0.15
	Others topics			41	0.683333
	Total			60	1
	Table 19: Distribution according to the learning means
		Learning means	Authors and Year of Publication	Frequency	Percentage
	1	Transnational networks e.g. C40 Cities Climate Leadership Group, Cities for Climate Protection Program; ASEAN Smart Cities Network; Slum/Shack Dwellers International; International United Cities and Local Governments	Lee (2019); Betsill and Bulkely (2004); Haupt, et al. (2019); Haupt (2020); Lee and Van de Meene (2012); Perkins and Machnamy (2019); Mocca (2018); Bradlow (2015); Moodley (2020); Moodley (2019); Tan, et al. (2021); Bellinson and Chu (2019); Salskov-Iverson (2006)	13	0.216667
	2	Partnership or cooperation programmes e.g. UN's Global Water Operator's Partnerships Alliance, Municipal Partnership Programme if the Swedish International Center for Local Democracy; LOGO East and LOGO South	Carolini, et al. (2018); Sonnesson and Norden (2020); Van Ewijk (2012); Van Ewijk, et al. (2015); Bontenbal (2013); Devers-Kanoglu (2009); Van Lindert (2009); Van Ewijk (2016); Shefer (2019)	9	0.15
	3	Funded projects e.g. European Commission Horizon 2020 Programme or Interreg	Calzada (2020); Valkering, et al. (2013); Johnson and Wilson (2006); Boulanger and Nagorny (2018); Gruber (2021); Ndebele, et al. (2020)	6	0.1
	4	Finance institutions e.g. World Bank	Wilson and Johnson (2007); Johnson and Wilson (2009)	2	0.0333333
	5	No indication		30	0.5
			Total	60	1

## Sheet: Process
		Table 20: Distribution according to the phases							Table 24: Distribution according to the synthesis of phases and mechanisms
	No. of phases	Learning phases either explicitly or implicitly mentioned	Authors and Year of Publication	Frequency	Percentage				Phase/mechanism	Authors and Year of Publication	Frequency	Percentage
									Internal assessment	Wolman and Page (2002); Lee and Van de Meene (2012); Ilgen, et al. (2019); Cambell (2009)	4	0.0444444
	1	Information seeking	Lee (2019); Pojani and Stead (2014); Marsden, et al. (2011); Marsden, et al. (2012); Cook and Ward (2011); Takao (2014);	6	0.1			Exploration	Information seeking	Lee (2019); Pojani and Stead (2014); Marsden, et al. (2011); Marsden, et al. (2012); Cook and Ward (2011); Takao (2014); Lee and Van de Meene (2012); Baldersheim, et al. (2002); Einstein, et al. (2019); Kalliomaki (2018); Carolini, et al. (2018)	10	0.111111
	1	Knowledge acquisition	Glaser and Brommelstroet (2020)	1	0.0166667				External search for information	Marsden, et al. (2011); Marsden, et al. (2012); Gonzales (2010); Salskov-Iversen (2006); Lundin, et al.(2015); Bray, et al. (2011); Sonesson and Norden (2020); Johnson and Wilson (2006); Cook and Ward (2011); Ansell, et al. (2017); Baldersheim, et al. (2002); Einstein, et al. (2019); Ilgen, et al. (2019); Campbell (2009); Wolman and Page (2002); Kalliomaki (2018); Carolini, et al. (2018)	17	0.188889
	2	Information seeking and adoption	Einstein, et al.(2019)	1	0.0166667				Internal search for information	Marsden, et al. (2011); Takao (2014); Shefer (2019)	3	0.0333333
	2	Learning and application	Wilson and Johnson (2007)	1	0.0166667				Learning intermediaries	Takao (2014); Carolini, et al. (2018); Haupt (2020); Peck and Theodore (2010); Haupt, et al. (2019); Lee and Van de Meene (2012); Betsill and Bulkeley (2004); Perkins and Machnamy (2019); Moodley (2020);	9	0.1
	3	Search, establishing links, and commitment to change	Baldersheim, et al. (2002)	1	0.0166667				Foundation Building	Shefer (2009); Baldersheim, et al. (2002)	2	0.0222222
	3	Information seeking; adoption; and policy change	Lee and van de Meene (2012)	1	0.0166667				Exploration	Moodley (2020); Ilgen, et al. (2019);	2	0.0222222
	3	Learning, application, and sharing	Bontenbal (2013)	1	0.0166667			Acquisition	Acquiring information	Also acquiring knowledge (Glaser and Brommelstroet (2020) or information (Campbell, 2009); learning (Wilson and Johnson, 2007; Bontenbal, 2013); Johnson and Wilson, 2006); Knowledge co-production (Ndebele, at al,. 2020); creating and sharing communication (Wolman and Page, 2002)	8	0.0888889
	3	Transdisciplinary co-production of knowledge, distillation, receptivity and capacity development	Ndebele, et al. (2020)	1	0.0166667				Processing/distillation of information	Wolman and Page (2002); Ndebele, et al. (2020); Kalliomaki (2018);	3	0.0333333
	3	Reflection, deeper learning; replication and adoption	Johnson and Wilson (2016)	1	0.0166667				Assessing information	Wolman and Page (2002); Boulanger-Nagorny (2018); Calzada (2020); Campbell (2009); Carolini, et al. (2018)	5	0.0555556
	4	Self recognition and awareness; acquiring information; study of models; knowledge storage; knowledge utilization	Campbell (2009)	1	0.0166667				Knowledge management	Campbell (2009); Cook and Ward (2011)	2	0.0222222
	4	Communications, processing, assessing, and utilizing of information	Wolman and Page (2002)	1	0.0166667				Receptivity and capacity development	Ndebele, et al. (2020)	1	0.0111111
	4	Exploration and marketing; building pipelines; translation and adoption; internalization and reflection	Ilgen, et al. (2019)	1	0.0166667			Utilization	Knowledge utilization	Wolman and Page (2002); Campbell (2009)	2	0.0222222
	4	In depth examination of solution; adapting the intervention to local conditions; addressing non-technical aspects and providing an operational framework	Calzada (2020)	1	0.0166667				Adoption	Adoption ( Lee and Van De Meene, 2012; Moodley (2020)); Einstein, et al. 2019)	3	0.0333333
	5	Context analysis; Action selection; implementation; first evaluation; complete evaluation	Boulanger and Nagorny (2018)	1	0.0166667				Application	Wilson and Johnson, 2007; Bontenbal, 2013	2	0.0222222
	5	Courtship and acclimatization; inspiration and reflection, adoption, supported implementation, after care	Moodley (2020)	1	0.0166667				Replication and adoption	Calzada, 2020; Johnson and Wilson, 2006);	2	0.0222222
	5	Search, discussions, recontextualization, reflection, collaboration	Kalliomaki (2018)	1	0.0166667				Action selection via co-creation	Boulanger-Nagorny, 2018	1	0.0111111
	6	(Partner) search, learning and adaptation, reappraisal, adaptation, strategic deployment of knowledge, reflection	Carolini, et al. (2018)	1	0.0166667				Recontextualization	Kalliomaki, 2018	1	0.0111111
		Subtotal		22	0.366667				Adaptation	Carolini, et al., 2018	1	0.0111111
		No indication		38	0.633333				Translation and adoption	Ilgen, et al., 2019	1	0.0111111
				60	1			Internalization	Internalization and reflection	Carolini, et al. (2018); Kalliomaki (2018); Ilgen, et al. (2019)	3	0.0333333
									(Supported) Implementation	Moodley (2020); Boulanger-Nagorny (2018); Calzada (2020)	3	0.0333333
									Sharing and knowledge deployment / knowledge dissemination	Carolini, et al. (2018); Bontenbal (2013)	2	0.0222222
									Collaboration	Kalliomaki (2018)	1	0.0111111
									Policy change	Lee and Van de Meene (2012)	1	0.0111111
		Table 21: Distribution according to the mechanisms							Evaluation	Boulanger-Nagorny (2018)	1	0.0111111
		Learning mechanisms either explicitly or implicitly mentioned (multiple responses)	Authors and Year of Publication (n=27 or 45% of the studies)	Frequency	Percentage						90	1
		External search for information	Marsden, et al. (2011); Marsden, et al. (2012); Gonzales (2010); Salskov-Iversen (2006); Lundin, et al.(2015); Bray, et al. (2011); Sonesson and Norden (2020); Johnson and Wilson (2006); Cook and Ward (2011); Ansell, et al. (2017); Baldersheim, et al. (2002); Einstein, et al. (2019); Ilgen, et al. (2019); Campbell (2009); Wolman and Page (2002); Kalliomaki (2018); Carolini, et al. (2018)	17	0.447368
		Internal search for information	Marsden, et al. (2011); Takao (2014); Shefer (2019)	3	0.0789474
		Involvement of intermediaries	Takao (2014); Carolini, et al. (2018); Haupt (2020); Peck and Theodore (2010); Haupt, et al. (2019); Lee and Van de Meene (2012); Betsill and Bulkeley (2004); Perkins and Machnamy (2019); Moodley (2020);	9	0.236842
		Internal assessment	Wolman and Page (2002); Lee and Van de Meene (2012); Ilgen, et al. (2019); Cambell (2009);	4	0.105263
		Foundation building	Shefer (2009); Baldersheim, et al. (2002); Ilgen, et al. (2019)	3	0.0789474
		Knowledge management	Campbell (2009); Cook and Ward (2011)	2	0.0526316
				38	1
		Table 22: Distribution according to venue for learning
		Venue for learning	Authors and Year of Publication	Frequency	Percentage
		Multiple methods	Haupt, et al. (2019); Ilgen, et al. (2019); Glaser and Brommelstroet (2020); Devers-Kanoglu (2009); Campbell (2011); Cook and Ward (2011); Gruber (2021); Tan, et al. (2021); Salskov-Ivesen (2006); Sonesson and Norden (2020); Wilson and Johnson (2007); Valkering, et al. (2013); Takao (2014)	13	0.216667
		Site visits/study tours	Haupt (2020); Glaser, et al. (2020); Shefer (2019); Wood (2014); Carolini, et al. (2018); Bradlow (2015); Baldersheim, et al.(2002); Ndebele, et al. (2020); Cook and Ward (2012); Montero (2017); Ma (2017); Peck and Theodore (2010); Van Ewijk (2012)	13	0.216667
		Funded projects	Johnson and Wilson (2006)	2	0.0333333
		Mentorship	Moodley (2019)	1	0.0166667
		Workshops	Kalliomaki (2018)	1	0.0166667
		Webinars	Calzada (2020)	1	0.0166667
		Peer networks	Marsden, et al. (2012)	1	0.0166667
			Subtotal	32	0.533333
		No indication		28	0.466667
			Total	60	1
		Table 23: Distribution according to temporal dimension of C2C learning
		Temporal dimension	Authors and Year of Publication	Frequency	Percentage
		With temporal indication (short, mid-to long term)	Carolini, et al. (2018); Wood (2014); Van Lindert (2009); Farmer and Perl (2018); Van Ewijk (2016); Moodlet (2019); Moodley (2020); Ndebele, et al. (2020); Ilgen, et al. (2019); Haupt (2020)	10	0.166667
		No indication	NA	50	0.833333
			Total	60	1

## Sheet: Conditions
	Table 25: Distribution according to learning conditions
	Learning Conditions	Authors and Year of Publication	Frequency	Percentage
	Similarity	Haupt (2020); Haupt, et al. (2019); Pojani and Stead (2014); Van Ewijk, et al. (2015); Van Ewijk (2012); Lundin, et al. (2015); Mocca (2018); Wilson and Johnson (2007); Valkering, et al. (2013); and Carolini, et al. (2018); Campbell (2009); Moodley (2020); Lee and Van de Meene (2012);	13	0.191176
	Resources	Van Ewijk (2012); Wilson and Johnson (2007); Moodley (2020); Haupt, et al.. (2019); Tan, et al. (2021); Shefer (2019)	6	0.0882353
	Diversity	Ilgen, et al. (2019); Van Ewijk (2012); Wilson and Johnson (2007); Valkering, et al. (2013(	4	0.0588235
	Organizational culture	Marsden, et al. (2011); Marsden, et al. (2012); Wilson and Johnson (2007)	3	0.0441176
	Trust	Van Ewijk (2012); Wilson and Johnson (2007); Moodley (2020)	3	0.0441176
	Time	Moodley (2020); Marsden, et al. (2012); Haupt, et all. (2019)	3	0.0441176
	Proximity	Lundin, et al. (2015); Carolini, et al. (2018)	2	0.0294118
	Learning facilitators	Valkering, et al. (2013); Moodley (2020)	2	0.0294118
	Learning purpose	Wilson and Johnson (2007); Johnson and Wilson (2006)	2	0.0294118
	Learning activities	Valkering, et al. (2013); Moodley (2020)	2	0.0294118
	Equality	Wilson and Johnson (2007); Van Ewijk (2012)	2	0.0294118
	Political capacity	Tan, et al. (2021); Johnson and Wilson (2006);	2	0.0294118
	Leadership	Ilgen, et al. (2019); Lee and Van de Meene (2012)	2	0.0294118
	Structural positions	Wilson and Johnson (2007); Johnson and Wilson (2006)	2	0.0294118
	Institutional barriers	Pojani and Stead (2014); Ilgen, et al. (2019)	2	0.0294118
	Power relations	Wilson and Johnson (2007); Van Ewijk (2012)	2	0.0294118
	Introspection	Ilgen, et al. (2019)	1	0.0147059
	Understanding of domestic local context	Shefer (2019)	1	0.0147059
	(Un)systematic search	Marsden, et al. (2011)	1	0.0147059
	Effective branding	Tan, et al. (2021)	1	0.0147059
	Demand for knowledge	Tan, et al. (2021)	1	0.0147059
	Enthusiam from private actors	Tan, et al. (2021)	1	0.0147059
	Heightened inteterst by network members	Tan, et al. (2021)	1	0.0147059
	Quality of the evidence base	Marsden, et al. (2011)	1	0.0147059
	Lack of technical expertise	Haupt, et al. (2019)	1	0.0147059
	Risk aversion	Marsden, et al. (2011)	1	0.0147059
	Nature of the transfer process	Pojani and Stead (2014)	1	0.0147059
	Complexity	Tan, et al. (2021)	1	0.0147059
	Knowledge amplification	Moodley (2020)	1	0.0147059
	Integrated approach	Valkering, et al. (2013);	1	0.0147059
	Operational mechanisms	Tan, et al. (2021)	1	0.0147059
	Communication	Moodley (2020)	1	0.0147059
			68	1

## Sheet: Outcomes
			Table 25: Distribution according to learning outcomes
			Learning Effects	Authors and Year of Publication	Frequency	Percentage
		Levels	Individual	Butler, et al. (2019); Glaser and Brommelstroet (2020); Pojani and Stead (2014)	3	0.05
			Organization	Haupt (2020)	1	0.0166667
			Network	Bellinson and Chu (2019); Wood (2014); Bradlow (2015)	3	0.05
			Individual and organization	Johnson and Wilson (2009); Devers-Kanoglu (2009); Glaser, et al. (2020); Johnson and Wilson (2006); Wilson and Johnson (2007); Gruber (2021); Bontenbal (2013); Carolini; et al. (2018); Sonesson and Norden (2020)	9	0.15
			Individual and network	Van Ewijk (2006)	1	0.0166667
			Individual, organization, and network	Van Ewijk, et al. (2015)	1	0.0166667
		Others	Depth of learning, including specific learning outcomes	Shefer (2019); Valkering, et al. (2013)	2	0.0333333
			Policy outcomes	Mocca (2018)	1	0.0166667
			Policy adoption	Bray, et al. (2011)	1	0.0166667
			Policy failure	Kalliomaki (2008)	1	0.0166667
			Limited learning	Sheldrick, et al. (2917)	1	0.0166667
			Little to no effect on decisions	Wolman and Page (2002)	1	0.0166667
			No indication		35	0.583333
			Total		60	1
